# Supplementary material for: Core–shell, hollow-structured iridium–nickel nitride nanoparticles for the hydrogen evolution reaction
Source: Royal Society of Chemistry journal article supplement (doi:10.1039/c3ta14301e), 2013-11-06
Supplement: c3ta14301e.pdf [file c3ta14301e.pdf]

## Electronic Supplementary Information (ESI)

### Core-Shell, Hollow-Structured Iridium–Nickel Nitride Nanoparticles for the Hydrogen Evolution Reaction

Kurian A. Kuttiyel,<sup>a</sup> Kotaro Sasaki,\*<sup>a</sup> Wei-Fu Chen,<sup>a</sup> Dong Su,<sup>b</sup> and Radoslav R. Adzic\*<sup>a</sup>

<sup>a</sup>Chemistry Department, Brookhaven National Laboratory, Upton, NY 11973, US.

E-mail: [ksasaki@bnl.gov](mailto:ksasaki@bnl.gov), [adzic@bnl.gov](mailto:adzic@bnl.gov)

<sup>b</sup>Center for Functional Nanomaterials, Brookhaven National Laboratory, Upton, NY 11973, US

### Experimental Procedures

**Synthesis.** The carbon supported Iridium (Ir) and Nickel (Ni) electrocatalyst was prepared by mixing (NH<sub>4</sub>)<sub>2</sub>IrCl<sub>6</sub>, Ni(HCO<sub>2</sub>)<sub>2</sub>·2H<sub>2</sub>O salts with high area Vulcan XC72R carbon black to obtain a Ir:Ni molecular ratio of 1:3 respectively. The total metal content was around 20%. The mixture was dissolved in Millipore water and purged with Ar in an ultrasonic bath for an hour. The salts were then reduced by adding NaBH<sub>4</sub> while simultaneously purging the mixture with Ar. The mixture obtained was washed and rinsed with Millipore water, and then dried. The sample was annealed at 250°C in N<sub>2</sub> stream followed by NH<sub>3</sub> gas at 510°C for 2 hours in a tube furnace.

Catalyst inks of nanoparticles were prepared by mixing 5 mg of each catalysts with 5 mL of 18 MΩ water. The solution was ultrasonicated until a dark, uniform ink was achieved. Thin-film electrodes with nanoparticles were prepared by placing 15 µl of nanoparticle suspension onto a flat glassy carbon electrode (5 mm diameter, Pine Instrument). After drying in vacuum, the electrode was covered with 10 µl of a dilute Nafion solution (2 µg/5 µl) and dried again. All the potentials are given with respect to a reversible hydrogen electrode (RHE). A platinum wire

served as the counter electrode while Ag/AgCl reference electrode was used. The electrolytes were prepared from perchloric acid (Fisher) and MilliQ UV-plus water.

**Characterization.** XRD measurements were taken with a Phillips 3100 diffractometer using Cu K $\alpha$  radiation (1.54056 Å). Samples for analysis were obtained by loading the slurries onto a glass slide, followed by drying them in air. The diffraction patterns were collected from 20° to 80° at a scanning rate of 0.6° per minute, with a step size of 0.02°.

*In situ* synchrotron XRD measurements were performed at the X7B beamline at NSLS to detail the formation of Ni nitride during annealing. The instrument parameters (Thompson-Cox-Hastings profile coefficients) were derived from the fit of a LaB<sub>6</sub> reference pattern. Approximately 5 mg of the carbon-supported IrNi<sub>3</sub> nanoparticles, which were reduced only by NaBH<sub>4</sub>, were loaded in a 1 mm quartz reactor that was attached to a flow system, and annealed at 250°C in N<sub>2</sub> stream followed by NH<sub>3</sub> gas up to 510°C at a heating rate of 4.8 °C/min. A small resistance heater was wrapped around the reactor capillary, and the temperature was monitored with a thin chromel-alumel thermocouple placed inside the capillary near the sample. The wavelength of X-ray used was 0.3184 Å. XRD patterns were recorded on a Mar345 image plate detector during annealing; the recording time for a spectrum is *ca* 2.6 min. Details of the synchrotron XRD experiment were described earlier.<sup>1,2</sup>

The as synthesized electrocatalyst were characterized by Hitachi aberration-corrected scanning transmission electron microscope (HD-2700C) at the Center for Functional Nanomaterials (CFN), Brookhaven National Laboratory (BNL). A 1.4Å electron probe with probe current ~50 pA was used in this study. The microscope was equipped with a cold field emission electron source with energy resolution 0.35 eV. The carbon supported nanoparticles

were dispersed in water and one drop of the slurry was deposited on a carbon covered copper grid (EMS, Hatfield, PA).

The study of HER on the carbon-supported IrNiN, Ir, Ni and Pt nanoparticles was carried out by means of slow potential sweeps ( $1 \text{ mV s}^{-1}$ ) in a  $0.1 \text{ M HClO}_4$  solution at 2500 rpm. HER can be described using the Tafel equation,  $\eta = a + b \log j + jR_s$ , where  $\eta$  denotes the applied overpotential,  $j$  the current density,  $b$  the Tafel slope,  $a$  the intercept relative to the exchange current density  $j_0$ , and  $R_s$  ( $\Omega\text{cm}^{-2}$ ) the total area-specific uncompensated resistance of the system. The Tafel slope was calculated from the linear portion of the plot in the low overpotential region.

### Supporting Figures

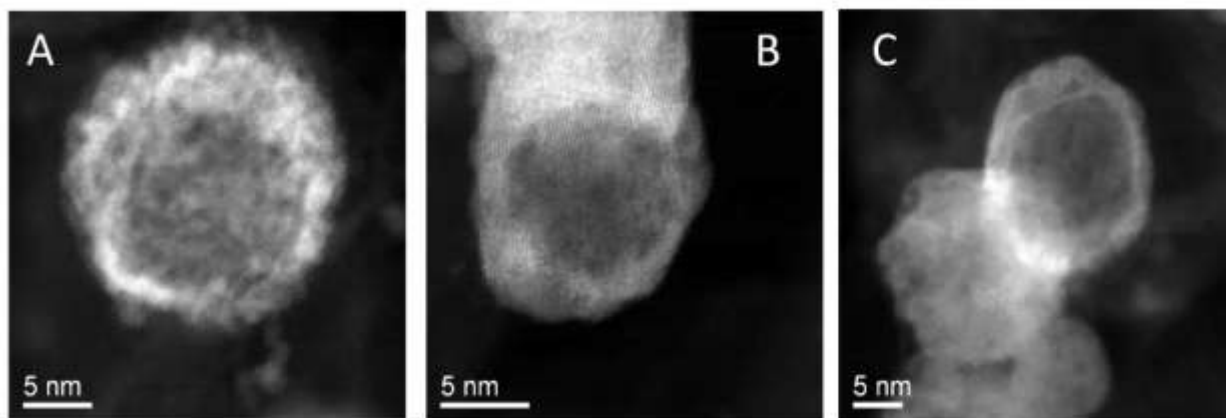

**Fig. S1** HAADF-STEM images of hollow IrNiN nanoparticles.

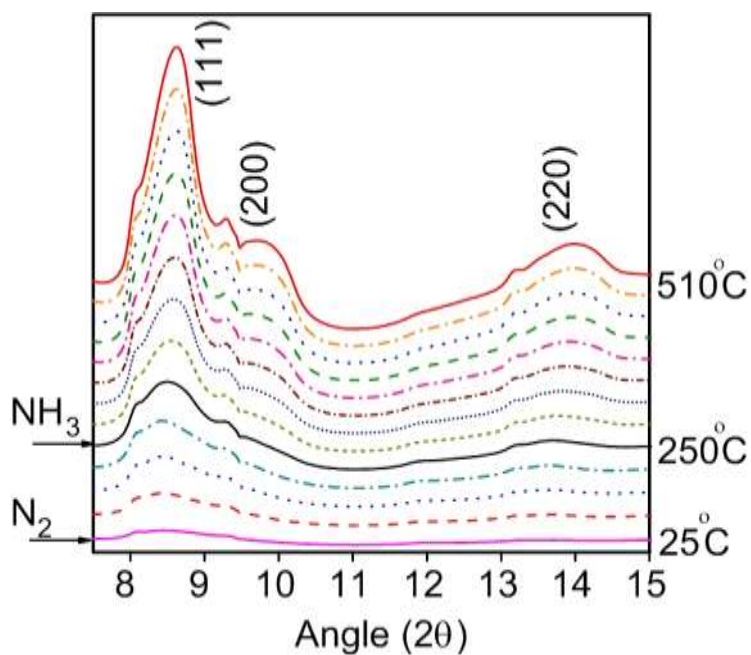

**Fig. S2** *In situ* synchrotron XRD patterns (the wavelength: 0.3184 Å) obtained from the IrNi<sub>3</sub> nanoparticles during reduction in N<sub>2</sub> and NH<sub>3</sub> flow at increasing temperatures.

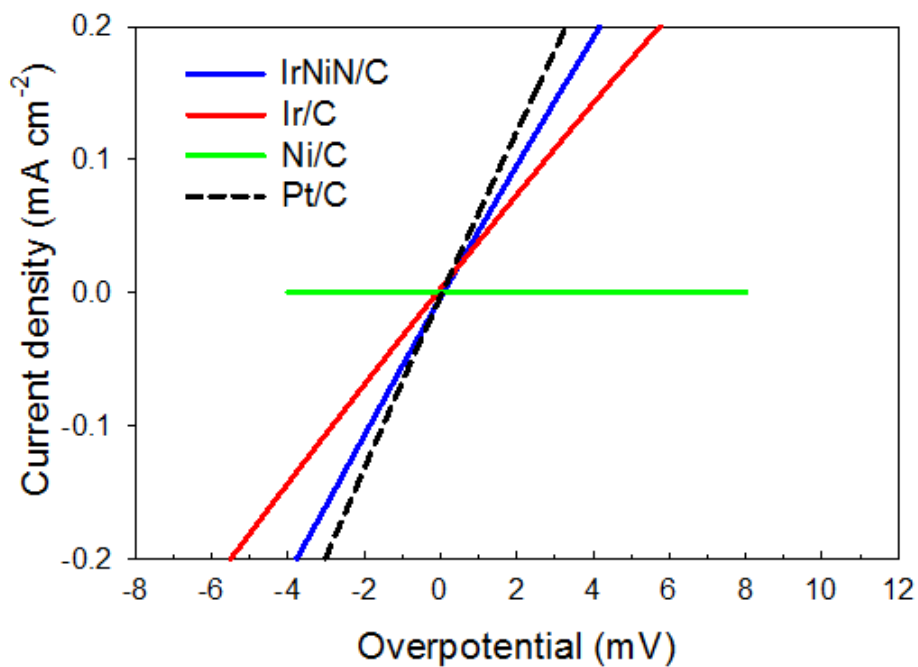

**Fig. S3** The *i*- $\eta$  plot at small  $\eta$  showing that the net current is linearly related to overpotential.

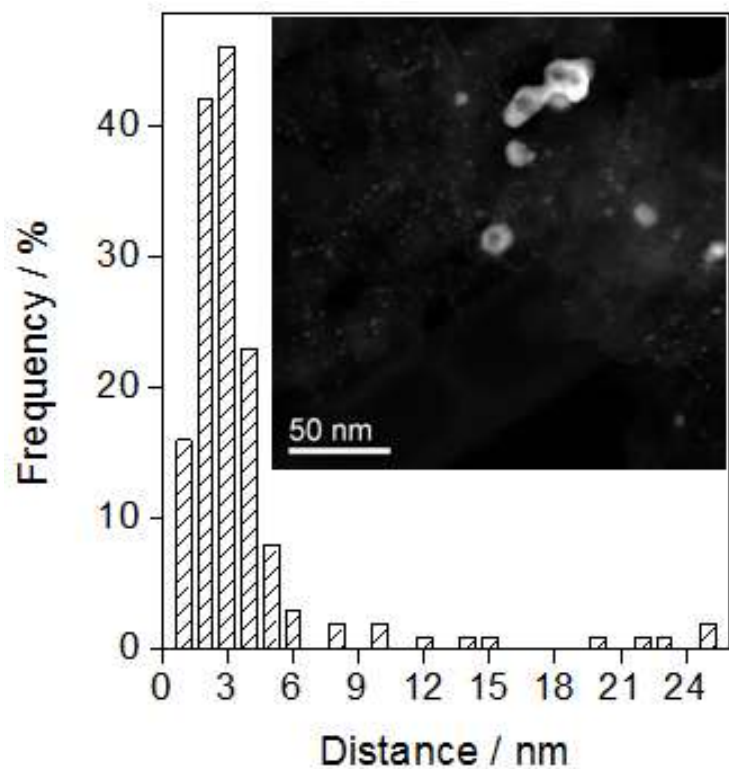

**Fig. S4** Particle size distribution of IrNiN core-shell nanoparticles (sample size=150).

| Catalyst | Specific mass activity @ $\eta = 0.1\text{ V}$<br>( $\text{mA cm}^{-2} \mu\text{g}_{\text{metal}}^{-1}$ ) | Tafel slope<br>( $\text{mV dec}^{-1}$ ) | Exchange current density, $j_0$<br>( $\text{mA cm}^{-2}$ ) |
|----------|-----------------------------------------------------------------------------------------------------------|-----------------------------------------|------------------------------------------------------------|
| Pt/C     | 3.58 <sup>a</sup>                                                                                         | 30.4                                    | 0.784                                                      |
| IrNiN/C  | 2.96 <sup>b</sup>                                                                                         | 36.0                                    | 0.613                                                      |
| Ir/C     | 1.15 <sup>b</sup>                                                                                         | 59.0                                    | 0.452                                                      |
| Ni/C     | 0.0196 <sup>c</sup>                                                                                       | 168.3                                   | $3.52 \times 10^{-4}$                                      |

<sup>a</sup> based on per  $\mu\text{g}$  of Pt. <sup>b</sup> per  $\mu\text{g}$  of Ir. <sup>c</sup> per  $\mu\text{g}$  of Ni.

**Table S1.** HER specific mass activity, the Tafel slope and the exchange current density of various catalysts obtained in 0.1 M HClO<sub>4</sub>.

## References

1. J. A. Rodriguez, J. C. Hanson, W. Wen, X. Q. Wang, J. L. Brito, A. Martinez-Arias and M. Fernandez-Garcia, *Catal Today*, 2009, **145**, 188-194.
2. L. Barrio, A. Kubacka, G. Zhou, M. Estrella, A. Martinez-Arias, J. C. Hanson, M. Fernandez-Garcia and J. A. Rodriguez, *J Phys Chem C*, 2010, **114**, 12689-12697.
